# Supplementary material for: Public perceptions of people with eating disorders: Commentary on results from the 2022 Australian national survey of mental health-related stigma and discrimination
Source: PubMed Central journal article supplement (PMC10108519; doi:10.1186/s40337-023-00786-z), 2023-04-16
Supplement: 40337_2023_786_MOESM2_ESM.pdf [file 40337_2023_786_MOESM2_ESM.pdf]

**Additional File 1.** Proportion of respondents agreeing with each public stigma statement (2022 National MentalHealth-Related Stigma and Discrimination Survey)

| Statement                                                                                             | Long-term Schizophrenia | Borderline Personality Disorder | Early Schizophrenia | Bipolar Disorder | Non-suicidal Self-injury | Depression | Eating Disorder | Social Phobia |
|-------------------------------------------------------------------------------------------------------|-------------------------|---------------------------------|---------------------|------------------|--------------------------|------------|-----------------|---------------|
| It is their own fault that people with this problem are in this condition                             | 4%                      | 8%                              | 5%                  | 8%               | 6%                       | 6%         | <b>11%</b>      | 6%            |
| This problem is not a real medical illness                                                            | 6%                      | 10%                             | 7%                  | 10%              | 7%                       | 7%         | <b>11%</b>      | 14%           |
| People with this problem will never recover enough to have good quality of life                       | 14%                     | 10%                             | 9%                  | 7%               | 7%                       | 5%         | <b>5%</b>       | 7%            |
| This problem is a sign of personal weakness                                                           | 9%                      | 14%                             | 10%                 | 9%               | 14%                      | 9%         | <b>12%</b>      | 13%           |
| People with this problem could snap out of it if they wanted                                          | 10%                     | 16%                             | 10%                 | 10%              | 11%                      | 10%        | <b>16%</b>      | 11%           |
| People with this problem are dangerous                                                                | 31%                     | 44%                             | 27%                 | 19%              | 20%                      | 8%         | <b>6%</b>       | 6%            |
| I feel scared of people with this problem                                                             | 36%                     | 40%                             | 29%                 | 18%              | 20%                      | 7%         | <b>8%</b>       | 6%            |
| People with this problem should be forced into treatment with their doctor even if they don't want to | 36%                     | 30%                             | 32%                 | 21%              | 34%                      | 19%        | <b>23%</b>      | 11%           |
| People with this problem are unpredictable                                                            | 68%                     | 74%                             | 62%                 | 67%              | 44%                      | 29%        | <b>15%</b>      | 16%           |
| I feel pity for people with this problem                                                              | 68%                     | 57%                             | 63%                 | 49%              | 63%                      | 59%        | <b>56%</b>      | 52%           |

*Note.* Each proportion includes people who responded either 'strongly agree' or 'agree' to the statement in relation the mental health problem listed in the column.  
**Source:** National Mental Health Commission (17). Reprinted with permission from the Behavioural Economics Team of the Australian Government.
