# Supplementary material for: Public perceptions of people with eating disorders: Commentary on results from the 2022 Australian national survey of mental health-related stigma and discrimination
Source: PubMed Central journal article supplement (PMC10108519; doi:10.1186/s40337-023-00786-z), 2023-04-16
Supplement: 40337_2023_786_MOESM3_ESM.pdf [file 40337_2023_786_MOESM3_ESM.pdf]

**Additional File 2.** Proportion of respondents unwilling to engage in the activity with the person described in the vignette (2022 National Mental Health-Related Stigma and Discrimination Survey)

| Activity                                                    | Long-term Schizophrenia | Borderline Personality Disorder | Early Schizophrenia | Bipolar Disorder | Non-suicidal Self-injury | Depression | Eating Disorder | Social Phobia |
|-------------------------------------------------------------|-------------------------|---------------------------------|---------------------|------------------|--------------------------|------------|-----------------|---------------|
| Move next door to someone with this problem                 | 64%                     | 62%                             | 55%                 | 41%              | 39%                      | 34%        | <b>26%</b>      | 20%           |
| Spend an evening socialising with someone with this problem | 63%                     | 55%                             | 43%                 | 37%              | 29%                      | 25%        | <b>22%</b>      | 15%           |
| Make friends with someone with this problem                 | 62%                     | 59%                             | 45%                 | 40%              | 32%                      | 25%        | <b>23%</b>      | 14%           |
| Work closely with someone with this problem                 | 66%                     | 61%                             | 48%                 | 47%              | 35%                      | 29%        | <b>25%</b>      | 18%           |
| Have someone with this problem marry in to family           | 84%                     | 82%                             | 71%                 | 63%              | 61%                      | 52%        | <b>42%</b>      | 29%           |
| Have them look after your children                          | 94%                     | 91%                             | 90%                 | 81%              | 81%                      | 77%        | <b>58%</b>      | 40%           |

*Note.* Each proportion includes people who reported being ‘definitely not’ or ‘probably not’ willing. Item ‘Have them look after your children’ excludes people who responded ‘Not applicable’.

**Source:** National Mental Health Commission (17). Reprinted with permission from the Behavioural Economics Team of the Australian Government.
